# Supplementary material for: R2R3-MYB Transcription Factor Family in Boehmeria nivea (L.) Gaudich: Potential Associations between Cd2+ Stress and Flavonoid Metabolism
Source: Research Square preprint supplement (doi:10.21203/rs.3.rs-871051/v1), 2021-09-21
Supplement: Supplementary file 1 [file 0fc73d69f9a18e0a917f3378.xlsx]

## Sheet: Cannabis sativa-Ramie
Table S5: One-to-one orthologous relationships between ramie and other five species.
Cannabis sativa	Genomic Location	Boehmeria nivea (L.) Gaudich	Genomic Location	E value	Gene numbers in the block
XM_030640656.1	Cs3	Maker00000907	Bn10	5e-82	14
XM_030640228.1	Cs3	Maker00058379	Bn12	2e-101	30
XM_030643268.1	Cs3	Maker00080208	Bn6	4e-78	32
XM_030643268.1	Cs3	Maker00061978	Bn6	8e-78	38
XM_030640410.1	Cs3	Maker00002294	Bn7	8e-91	13
XM_030643268.1	Cs3	Maker00010012	Bn9	5e-80	24
XM_030648511.1	Cs5	Maker00050665	Bn3	3e-94	52
XM_030649582.1	Cs5	Maker00030668	Bn3	1e-109	39
XM_030647336.1	Cs5	Maker00025443	Bn3	5e-101	11
XM_030648129.1	Cs5	Maker00010012	Bn9	2e-68	11
XM_030632262.1	Cs1	Maker00075016	Bn1	6e-68	13
XM_030634205.1	Cs1	Maker00075734	Bn1	4e-83	11
XM_030631891.1	Cs1	Maker00043572	Bn13	1e-75	15
XM_030634400.1	Cs1	Maker00043647	Bn13	1e-53	15
XM_030634400.1	Cs1	Maker00091416	Bn2	3e-66	124
XM_030634205.1	Cs1	Maker00083753	Bn6	7e-118	84
XM_030631891.1	Cs1	Maker00087523	Bn8	6e-70	41
XM_030622815.1	Cs7	Maker00052046	Bn11	7e-100	18
XM_030622815.1	Cs7	Maker00069320	Bn11	1e-75	12
XM_030626187.1	Cs9	Maker00013653	Bn4	2e-132	54
XM_030626237.1	Cs9	Maker00071853	Bn4	2e-111	14
XM_030627894.1	Cs9	Maker00000820	Bn4	2e-94	152
XM_030627930.1	Cs9	Maker00000713	Bn4	5e-117	56
XM_030625572.1	Cs9	Maker00000585	Bn4	5e-65	56
XM_030629344.1	Cs9	Maker00057272	Bn4	2e-45	49
XM_030627762.1	Cs9	Maker00000810	Bn4	9e-61	38
XM_030626237.1	Cs9	Maker00062204	Bn4	5e-113	24
XM_030629198.1	Cs9	Maker00064417	Bn7	4e-112	31
XM_030627894.1	Cs9	Maker00064504	Bn7	5e-70	14
XM_030644580.1	Cs4	Maker00076183	Bn1	1e-101	88
XM_030644419.1	Cs4	Maker00076244	Bn1	4e-114	14
XM_030646720.1	Cs4	Maker00077797	Bn5	3e-62	14
XM_030644623.1	Cs4	Maker00052728	Bn5	2e-91	120
XM_030650938.1	Cs6	Maker00019397	Bn14	2e-134	11
XM_030652938.1	Cs6	Maker00061978	Bn6	6e-72	11
XM_030651134.1	Cs6	Maker00010005	Bn9	2e-122	128
XM_030652938.1	Cs6	Maker00010012	Bn9	1e-85	38
XM_030630181.1	CsX	Maker00058364	Bn12	1e-99	26
XM_030635107.1	CsX	Maker00058364	Bn12	8e-64	25
XM_030623070.1	CsX	Maker00083096	Bn13	2e-91	19
XM_030635107.1	CsX	Maker00003213	Bn13	1e-58	13
XM_030629895.1	CsX	Maker00043647	Bn13	6e-50	55
XM_030646964.1	CsX	Maker00043572	Bn13	3e-70	55
XM_030629877.1	CsX	Maker00096205	Bn13	1e-78	20
XM_030639466.1	CsX	Maker00003213	Bn13	2e-113	13
XM_030639466.1	CsX	Maker00047127	Bn13	5e-113	10
XM_030629895.1	CsX	Maker00091416	Bn2	9e-61	18
XM_030630467.1	CsX	Maker00079675	Bn6	1e-70	17
XM_030635107.1	CsX	Maker00079675	Bn6	1e-67	86
XM_030630181.1	CsX	Maker00079675	Bn6	4e-72	10
XM_030646964.1	CsX	Maker00087523	Bn8	5e-69	20
XM_030639654.1	Cs2	Maker00059272	Bn10	7e-59	28
XM_030638956.1	Cs2	Maker00049331	Bn10	5e-103	16
XM_030637322.1	Cs2	Maker00074230	Bn10	2e-90	11
XM_030637150.1	Cs2	Maker00073830	Bn10	6e-67	45
XM_030640033.1	Cs2	Maker00049451	Bn10	7e-127	26
XM_030639860.1	Cs2	Maker00032889	Bn14	6e-75	25
XM_030624984.1	Cs8	Maker00066632	Bn5	0	37

## Sheet: Apocynum venetum-Ramie
Table. S5 One-to-one orthologous relationships between ramie and other five species.
Apocynum venetum	Genomic Location	Boehmeria nivea (L.) Gaudich	Genomic Location	E value	Gene numbers in the block
EVM0006620.1	Av1	Maker00075734	Bn1	2e-85	14
EVM0004908.1	Av2	Maker00076244	Bn1	1e-73	219
EVM0017080.1	Av2	Maker00075734	Bn1	5e-70	219
EVM0007140.1	Av2	Maker00075016	Bn1	7e-65	66
EVM0009152.1	Av11	Maker00076082	Bn1	3e-99	29
EVM0003633.1	Av1	Maker00091416	Bn2	3e-63	115
EVM0012894.1	Av11	Maker00091361	Bn2	2e-70	16
EVM0012308.1	Av3	Maker00044418	Bn3	2e-74	10
EVM0007496.1	Av3	Maker00029953	Bn3	3e-150	19
EVM0010481.1	Av3	Maker00025443	Bn3	6e-79	13
EVM0002671.2	Av6	Maker00030423	Bn3	4e-59	136
EVM0004880.1	Av6	Maker00030668	Bn3	4e-78	81
EVM0004787.1	Av6	Maker00025443	Bn3	9e-94	37
EVM0011476.1	Av6	Maker00044418	Bn3	5e-83	32
EVM0002954.1	Av7	Maker00050665	Bn3	3e-85	73
EVM0006731.1	Av1	Maker00000810	Bn4	1e-38	131
EVM0019207.1	Av1	Maker00013653	Bn4	4e-78	12
EVM0007846.2	Av2	Maker00013653	Bn4	2e-108	15
EVM0009026.1	Av4	Maker00057272	Bn4	3e-137	17
EVM0006870.1	Av4	Maker00055186	Bn4	5e-91	22
EVM0006870.1	Av4	Maker00040122	Bn4	4e-91	21
EVM0017058.1	Av4	Maker00000713	Bn4	6e-51	20
EVM0020196.1	Av4	Maker00000810	Bn4	9e-45	15
EVM0018112.1	Av7	Maker00013653	Bn4	7e-117	52
EVM0013840.1	Av7	Maker00071853	Bn4	2e-81	13
EVM0013840.1	Av7	Maker00062204	Bn4	8e-83	26
EVM0003679.1	Av8	Maker00000820	Bn4	4e-84	56
EVM0005121.1	Av10	Maker00067925	Bn4	2e-73	24
EVM0004348.1	Av10	Maker00000820	Bn4	2e-86	133
EVM0005121.1	Av10	Maker00039955	Bn4	2e-72	28
EVM0007199.1	Av1	Maker00077797	Bn5	6e-55	29
EVM0007496.1	Av3	Maker00066632	Bn5	3e-151	47
EVM0004898.1	Av3	Maker00017016	Bn5	0	39
EVM0012699.1	Av11	Maker00077519	Bn5	2e-65	212
EVM0002854.1	Av11	Maker00077797	Bn5	6e-66	212
EVM0005649.1	Av1	Maker00079675	Bn6	3e-79	61
EVM0006620.1	Av1	Maker00083753	Bn6	2e-96	60
EVM0004419.1	Av1	Maker00079675	Bn6	1e-71	15
EVM0006003.1	Av5	Maker00061978	Bn6	2e-73	16
EVM0011451.1	Av6	Maker00080208	Bn6	4e-71	213
EVM0011451.1	Av6	Maker00061978	Bn6	5e-71	35
EVM0012754.1	Av1	Maker00064417	Bn7	3e-118	60
EVM0003679.1	Av8	Maker00064504	Bn7	2e-66	360
EVM0007329.1	Av8	Maker00064534	Bn7	0	360
EVM0012130.1	Av8	Maker00064417	Bn7	1e-93	360
EVM0008404.1	Av8	Maker00002294	Bn7	2e-84	18
EVM0004348.1	Av10	Maker00064504	Bn7	2e-63	16
EVM0018608.1	Av1	Maker00087523	Bn8	1e-73	42
EVM0006411.1	Av1	Maker00079198	Bn8	8e-94	10
EVM0016849.2	Av3	Maker00087523	Bn8	9e-55	124
EVM0012894.1	Av11	Maker00087523	Bn8	9e-55	124
EVM0012599.1	Av2	Maker00010012	Bn9	5e-68	22
EVM0006003.1	Av5	Maker00010012	Bn9	6e-85	162
EVM0020024.2	Av5	Maker00010005	Bn9	2e-59	162
EVM0011451.1	Av6	Maker00010012	Bn9	6e-71	33
EVM0006731.1	Av1	Maker00049331	Bn10	7e-57	24
EVM0010481.1	Av3	Maker00073830	Bn10	7e-69	62
EVM0017058.1	Av4	Maker00059272	Bn10	3e-40	32
EVM0004717.1	Av4	Maker00049451	Bn10	1e-90	15
EVM0020196.1	Av4	Maker00049331	Bn10	1e-92	52
EVM0009914.1	Av4	Maker00074230	Bn10	2e-78	31
EVM0017669.1	Av8	Maker00000907	Bn10	3e-80	12
EVM0013176.1	Av10	Maker00000907	Bn10	4e-90	38
EVM0019507.1	Av1	Maker00077137	Bn11	2e-40	226
EVM0000995.1	Av1	Maker00008700	Bn11	6e-141	226
EVM0001979.1	Av3	Maker00052046	Bn11	2e-61	70
EVM0015855.1	Av3	Maker00041645	Bn11	6e-93	14
EVM0015855.1	Av3	Maker00037560	Bn11	1e-93	95
EVM0004419.1	Av1	Maker00058364	Bn12	1e-90	166
EVM0005649.1	Av1	Maker00058364	Bn12	1e-68	75
EVM0002375.1	Av4	Maker00058379	Bn12	4e-82	43
EVM0007310.1	Av9	Maker00058379	Bn12	4e-96	21
EVM0010810.1	Av9	Maker00058364	Bn12	9e-81	34
EVM0005649.1	Av1	Maker00003213	Bn13	1e-68	28
EVM0004419.1	Av1	Maker00003213	Bn13	3e-74	26
EVM0003633.1	Av1	Maker00043647	Bn13	6e-52	16
EVM0018608.1	Av1	Maker00043572	Bn13	7e-74	16
EVM0016849.2	Av3	Maker00043572	Bn13	1e-51	19
EVM0002375.1	Av4	Maker00043616	Bn13	8e-81	11
EVM0010810.1	Av9	Maker00003213	Bn13	5e-77	63
EVM0010810.1	Av9	Maker00047127	Bn13	6e-77	15
EVM0007310.1	Av9	Maker00043616	Bn13	8e-104	29
EVM0000365.1	Av9	Maker00096205	Bn13	9e-78	14
EVM0008164.1	Av9	Maker00024528	Bn13	1e-90	12
EVM0012894.1	Av11	Maker00043572	Bn13	1e-73	65
EVM0004333.1	Av3	Maker00032889	Bn14	9e-68	155
EVM0012308.1	Av3	Maker00032881	Bn14	1e-78	155
EVM0011476.1	Av6	Maker00032881	Bn14	4e-89	12

## Sheet: Arabidopsis-Ramie
Table. S5 One-to-one orthologous relationships between ramie and other five species.
Arabidopsis thaliana	Genomic Location	Boehmeria nivea (L.) Gaudich	Genomic Location	E value	Gene numbers in the block
AT3G12720.1	At3	Maker00075382	Bn1	1e-87	12
AT3G02940.1	At3	Maker00076183	Bn1	2e-86	18
AT4G25560.1	At4	Maker00076244	Bn1	2e-60	46
AT5G52260.1	At5	Maker00076244	Bn1	7e-63	105
AT5G62320.1	At5	Maker00076082	Bn1	2e-69	30
AT5G16770.1	At5	Maker00076183	Bn1	8e-88	18
AT1G09540.1	At1	Maker00050665	Bn3	3e-86	27
AT1G57560.1	At1	Maker00050665	Bn3	3e-87	25
AT3G46130.1	At3	Maker00030423	Bn3	3e-56	13
AT5G58850.1	At5	Maker00030668	Bn3	1e-69	40
AT5G26660.1	At5	Maker00050665	Bn3	2e-85	13
AT5G59780.3	At5	Maker00030423	Bn3	7e-50	19
AT1G66230.1	At1	Maker00039955	Bn4	2e-73	14
AT2G32460.1	At2	Maker00062204	Bn4	4e-84	11
AT3G27785.1	At3	Maker00000810	Bn4	3e-50	77
AT3G28470.1	At3	Maker00000713	Bn4	1e-91	77
AT5G40360.1	At5	Maker00000810	Bn4	2e-39	52
AT5G14340.1	At5	Maker00000820	Bn4	7e-85	69
AT1G63910.1	At1	Maker00077519	Bn5	7e-64	79
AT2G37630.1	At2	Maker00017016	Bn5	6e-169	10
AT4G17785.1	At4	Maker00052728	Bn5	1e-69	14
AT2G31180.1	At2	Maker00080208	Bn6	3e-71	10
AT3G61250.1	At3	Maker00083753	Bn6	7e-94	22
AT5G67300.1	At5	Maker00079675	Bn6	9e-69	10
AT1G14350.2	At1	Maker00064534	Bn7	0	53
AT1G71030.1	At1	Maker00002294	Bn7	5e-37	15
AT2G02820.2	At2	Maker00064534	Bn7	0	59
AT3G23250.1	At3	Maker00010012	Bn9	2e-81	36
AT4G13480.1	At4	Maker00010005	Bn9	1e-86	11
AT1G16490.1	At1	Maker00074230	Bn10	4e-72	12
AT1G74650.1	At1	Maker00019930	Bn10	6e-103	12
AT1G79180.2	At1	Maker00074230	Bn10	6e-103	12
AT3G12820.1	At3	Maker00074230	Bn10	3e-66	13
AT5G07690.1	At5	Maker00059685	Bn10	1e-59	18
AT5G40330.1	At5	Maker00049342	Bn10	1e-63	14
AT5G40360.1	At5	Maker00049331	Bn10	7e-52	14
AT5G61420.2	At5	Maker00059685	Bn10	2e-60	21
AT4G26930.1	At4	Maker00077137	Bn11	4e-60	43
AT5G55020.1	At5	Maker00077137	Bn11	1e-64	65
AT5G56110.1	At5	Maker00008700	Bn11	7e-117	40
AT5G57620.1	At5	Maker00041645	Bn11	2e-72	10
AT2G23290.1	At2	Maker00058364	Bn12	7e-75	40
AT3G49690.1	At3	Maker00058379	Bn12	2e-83	46
AT3G50060.1	At3	Maker00058364	Bn12	3e-70	46
AT4G37260.1	At4	Maker00058364	Bn12	4e-76	41
AT4G37780.1	At4	Maker00058379	Bn12	1e-75	41
AT5G65790.1	At5	Maker00058379	Bn12	4e-83	22
AT5G67300.1	At5	Maker00058364	Bn12	6e-82	54
AT3G49690.1	At3	Maker00043616	Bn13	8e-83	13
AT3G50060.1	At3	Maker00047127	Bn13	1e-69	13
AT5G67300.1	At5	Maker00003213	Bn13	4e-77	18
AT2G36890.2	At2	Maker00032881	Bn14	3e-80	30
AT3G53200.1	At3	Maker00032889	Bn14	2e-61	15

## Sheet: Rice-Ramie
Table. S5 One-to-one orthologous relationships between ramie and other five species.
Oryza sativa	Genomic Location	Boehmeria nivea (L.) Gaudich	Genomic Location	E value	Gene numbers in the block
LOC_Os01g63680.1	Os1	Maker00030668	Bn3	7e-44	34
LOC_Os11g47460.1	Os11	Maker00030423	Bn3	1e-45	12
LOC_Os05g04820.1	Os5	Maker00050665	Bn3	1e-88	12
LOC_Os01g63160.1	Os1	Maker00066632	Bn5	2e-81	6
LOC_Os03g29614.1	Os3	Maker00087523	Bn8	2e-62	15
LOC_Os06g10350.1	Os6	Maker00087523	Bn8	5e-63	9
LOC_Os10g33810.1	Os10	Maker00010012	Bn9	4e-65	9
LOC_Os01g07450.1	Os1	Maker00049451	Bn10	8e-60	10

## Sheet: Maize-Ramie
Table. S5 One-to-one orthologous relationships between ramie and other five species.
Zea mays	Genomic Location	Boehmeria nivea (L.) Gaudich	Genomic Location	E value	Gene numbers in the block
Zm00001d035604_T001	Zm6	Maker00030423	Bn3	2e-37	17
Zm00001d042849_T001	Zm3	Maker00066632	Bn5	8e-17	18
Zm00001d012379_T001	Zm8	Maker00066632	Bn5	5e-84	10
Zm00001d032694_T001	Zm1	Maker00010012	Bn9	1e-67	12

## Sheet: Collinear MYBs characteristics
Table. S5 One-to-one orthologous relationships between ramie and other five species.
Common collinear BnGMYB gene pairs in dicotyledonous plant	Common collinear BnGMYB gene pairs in monocotyledonous plant	Collinear BnGMYB gene pairs of dicotyledons coexist，but monocotyledons noexist	Collinear BnGMYB gene pairs of monocotyledons and dicotyledons coexist
Maker00058379	Maker00030423	Maker00058379	Maker00010012
Maker00080208	Maker00066632	Maker00080208
Maker00002294	Maker00010012	Maker00002294
Maker00010012		Maker00050665
Maker00050665		Maker00030668
Maker00030668		Maker00083753
Maker00083753		Maker00000820
Maker00000820		Maker00000713
Maker00000713		Maker00000810
Maker00000810		Maker00062204
Maker00062204		Maker00076244
Maker00076244		Maker00010005
Maker00010005		Maker00058364
Maker00058364		Maker00003213
Maker00003213		Maker00047127
Maker00047127		Maker00079675
Maker00079675		Maker00049331
Maker00049331		Maker00074230
Maker00074230		Maker00032889
Maker00032889
