# Supplementary material for: R2R3-MYB Transcription Factor Family in Boehmeria nivea (L.) Gaudich: Potential Associations between Cd2+ Stress and Flavonoid Metabolism
Source: Research Square preprint supplement (doi:10.21203/rs.3.rs-871051/v1), 2021-09-21
Supplement: Supplementary file 2 [file 7e817853e666ca9a0881fe64.xlsx]

## Sheet: a
Table S4: Ka/Ks calculation of the duplicated ramie R2R3-MYB gene pairs.
Gene1	Gene2	Ka	Ks	Ka/Ks	Duplication Type
BnGMYB51	BnGMYB52	0.0310333	0.0539154	0.575592	Tandem
BnGMYB93	BnGMYB94	0.542266	1.76698	0.306888	Tandem
BnGMYB32	BnGMYB33	0.548282	2.11259	0.259531	Tandem
BnGMYB61	BnGMYB62	0.607178	3.2657	0.185926	Tandem
BnGMYB105	BnGMYB98	0.0149784	0.0392407	0.381705	Segmental
BnGMYB103	BnGMYB100	0.00824589	0.055168	0.149469	Segmental
BnGMYB4	BnGMYB35	0.33607	1.72115	0.195259	Segmental
BnGMYB79	BnGMYB80	0.0201242	0.0522649	0.385042	Segmental
BnGMYB75	BnGMYB30	0.74806	4.50911	0.1659	Segmental
BnGMYB78	BnGMYB28	0.326172	2.26832	0.143795	Segmental
BnGMYB74	BnGMYB57	0.492625	2.32765	0.21164	Segmental
BnGMYB82	BnGMYB85	0.00896872	0.0340581	0.263336	Segmental
BnGMYB83	BnGMYB84	0.00992844	0.0120243	0.825698	Segmental
BnGMYB89	BnGMYB90	0.293249	0.726836	0.40346	Segmental
BnGMYB88	BnGMYB92	0.495471	1.3376	0.370418	Segmental
BnGMYB89	BnGMYB91	0.283615	0.765287	0.3706	Segmental
BnGMYB89	BnGMYB45	0.448361	0.854589	0.524652	Segmental
BnGMYB90	BnGMYB91	0.00471453	0.00969319	0.486375	Segmental
BnGMYB93	BnGMYB10	0.45664	3.40203	0.134226	Segmental
BnGMYB90	BnGMYB45	0.445429	0.798777	0.557638	Segmental
BnGMYB91	BnGMYB45	0.44672	0.792879	0.563415	Segmental
BnGMYB93	BnGMYB61	0.59225	2.51317	0.235658	Segmental
BnGMYB102	BnGMYB13	0.34018	1.28649	0.264425	Segmental
BnGMYB9	BnGMYB26	0.382891	2.04034	0.18766	Segmental
BnGMYB8	BnGMYB59	0.00688868	0.0397115	0.173468	Segmental
Maker00025472	BnGMYB64	0.438207	1.85107	0.236731	Segmental
BnGMYB21	BnGMYB22	0.00163755	0.0173753	0.0942462	Segmental
BnGMYB23	BnGMYB24	0.00883663	0.0106009	0.833575	Segmental
BnGMYB19	BnGMYB20	0.00878025	0.023821	0.368593	Segmental
BnGMYB31	BnGMYB58	0.454079	2.89269	0.156975	Segmental
Maker00000772	BnGMYB54	0.675442	1.94146	0.347904	Segmental
BnGMYB21	BnGMYB48	0.386685	2.04115	0.189445	Segmental
BnGMYB34	Maker00072694	0.667146	3.91802	0.170276	Segmental
BnGMYB43	BnGMYB44	0.0221803	0.0490353	0.452334	Segmental
BnGMYB43	BnGMYB64	0.51789	2.7233	0.19017	Segmental
BnGMYB44	BnGMYB64	0.476429	2.75854	0.17271	Segmental
BnGMYB49	BnGMYB50	0.00223464	0.016195	0.137984	Segmental
BnGMYB66	BnGMYB67	0.0512382	0.0492537	1.04029	Segmental
BnGMYB17	BnGMYB38	0.0022173	0.0371823	0.0596331	Segmental
BnGMYB6	BnGMYB42	0.383369	NaN	NaN	Segmental	High Sequence Divergence Value (pS>=0.75)
BnGMYB68	BnGMYB14	0.442288	NaN	NaN	Segmental	High Sequence Divergence Value (pS>=0.75)
BnGMYB94	BnGMYB11	0.501139	NaN	NaN	Segmental	High Sequence Divergence Value (pS>=0.75)
BnGMYB11	BnGMYB62	0.512371	NaN	NaN	Segmental	High Sequence Divergence Value (pS>=0.75)
