# Supplementary material for: R2R3-MYB Transcription Factor Family in Boehmeria nivea (L.) Gaudich: Potential Associations between Cd2+ Stress and Flavonoid Metabolism
Source: Research Square preprint supplement (doi:10.21203/rs.3.rs-871051/v1), 2021-09-21

**Figure S1:** Phylogenetic relationships (neighbor-joining), gene structure and architecture of conserved protein motifs in BnGR2R3-MYB genes


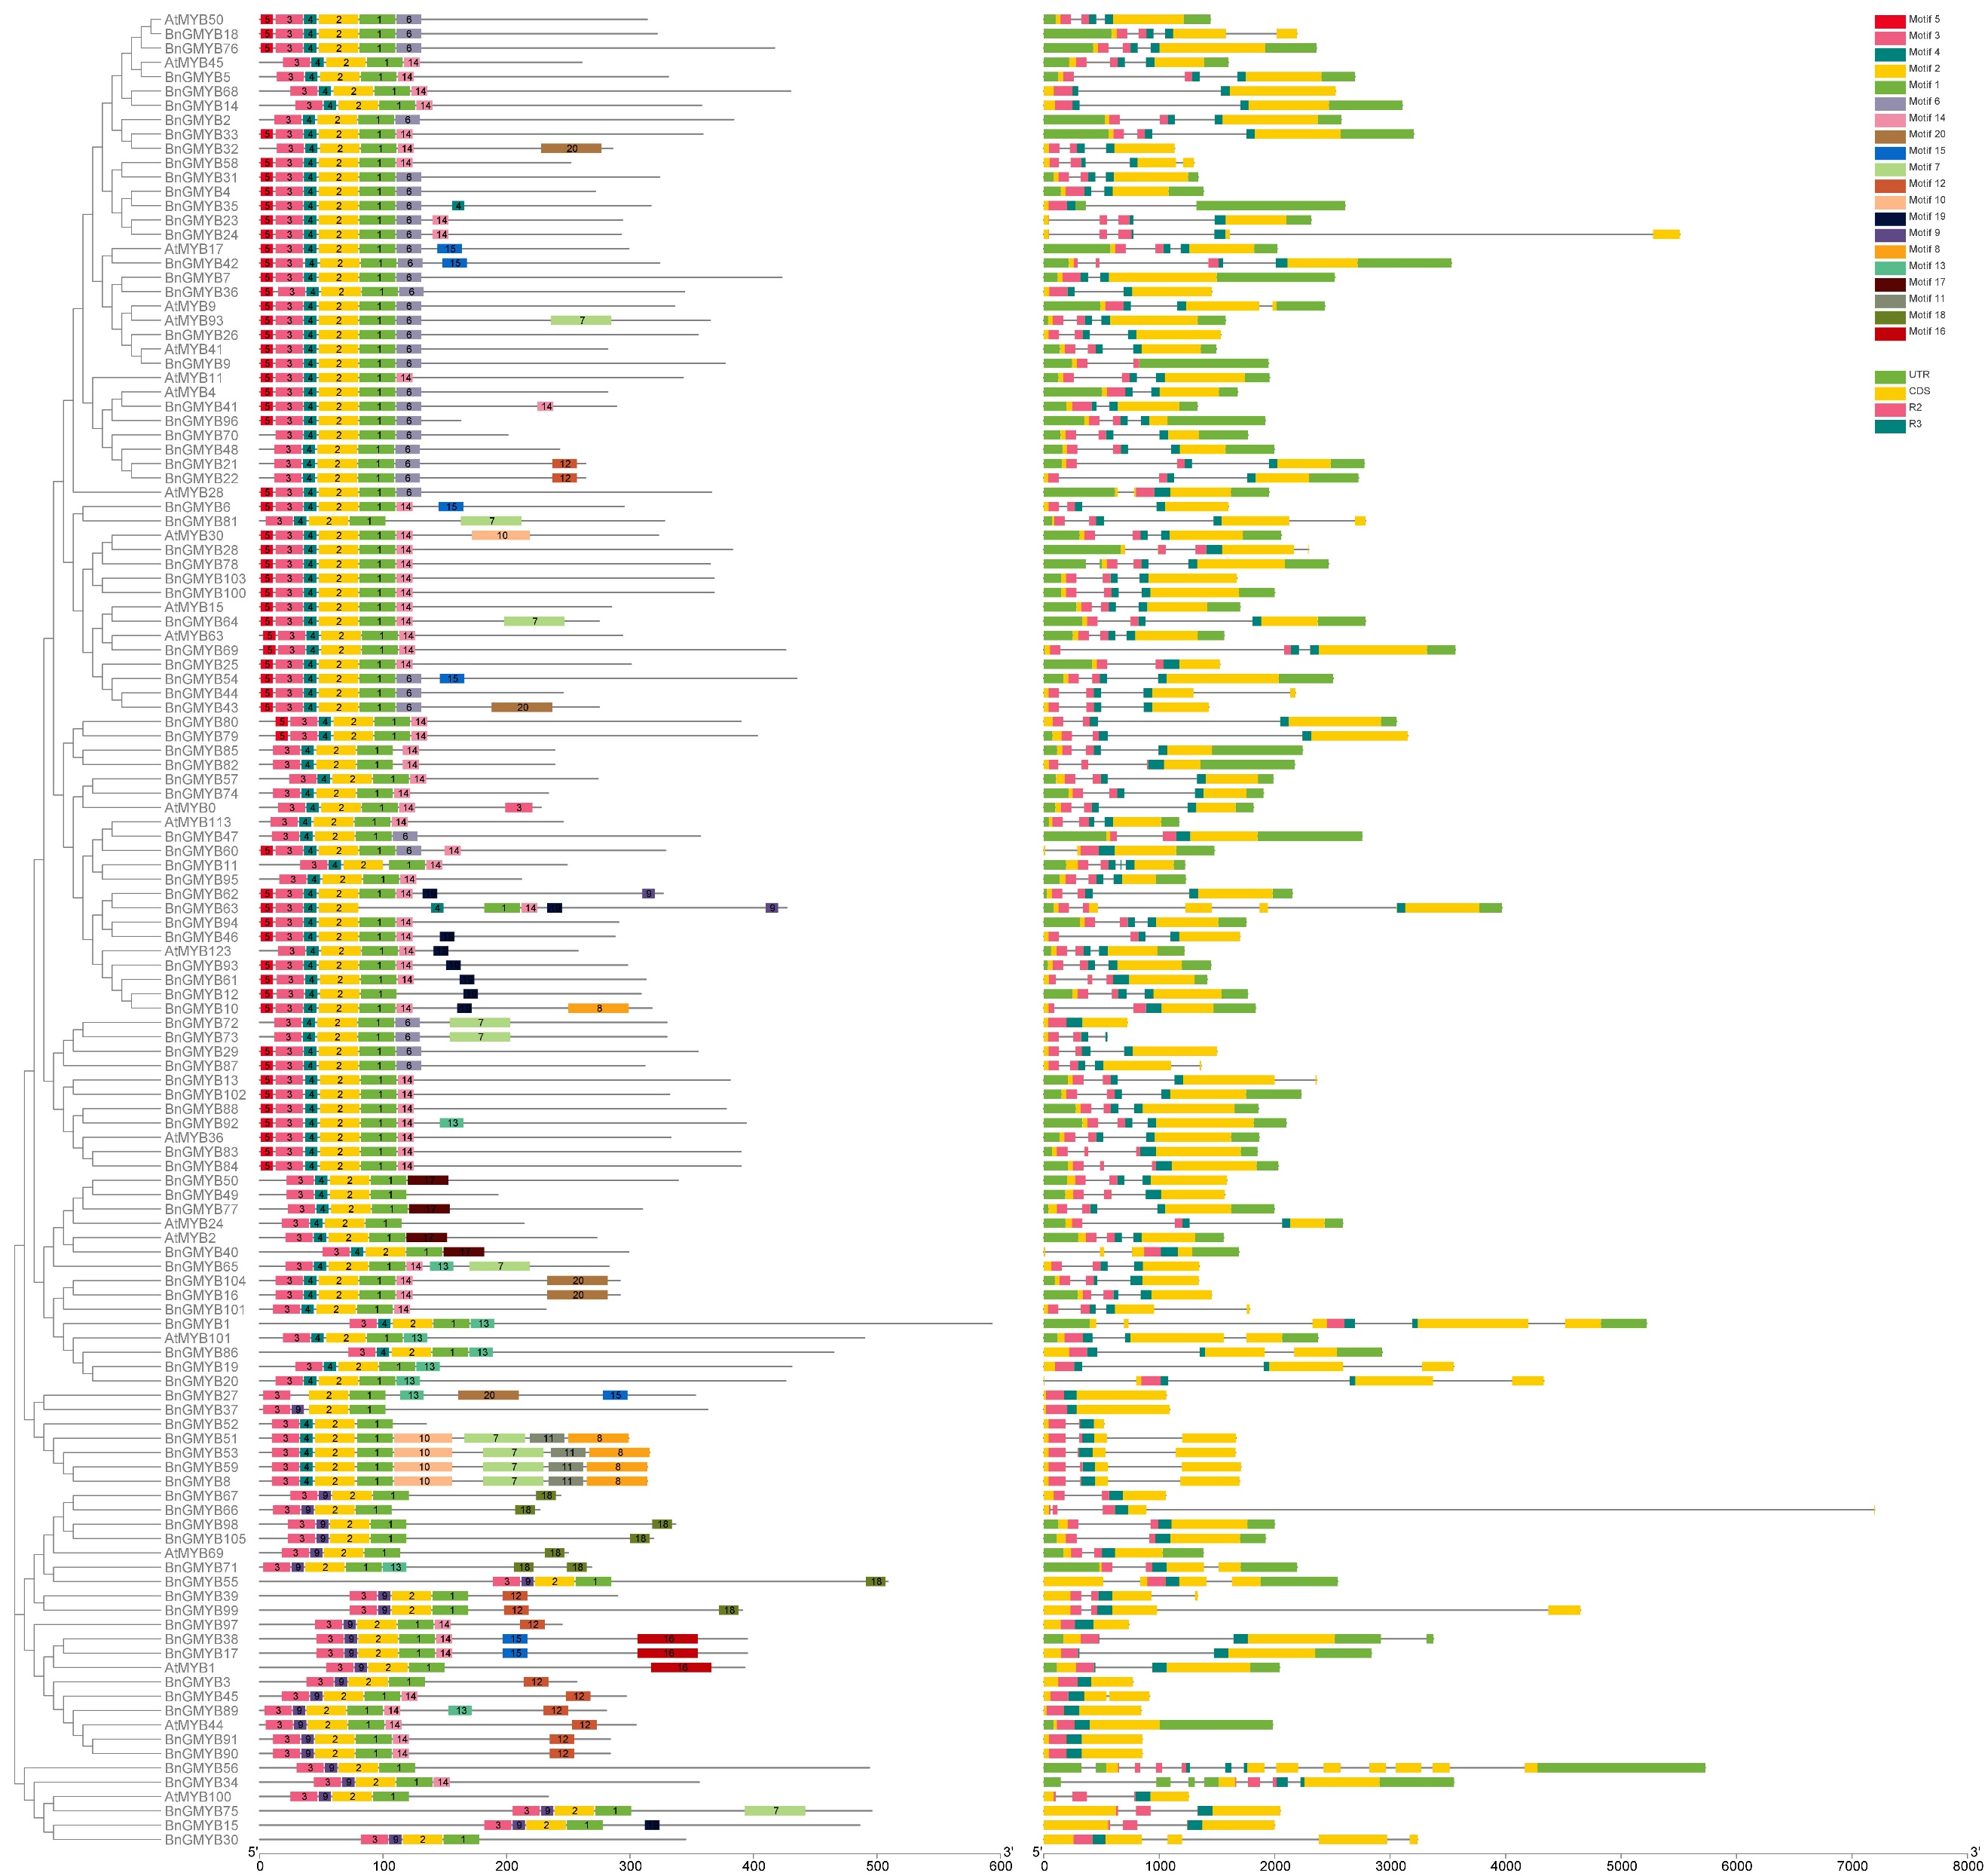

Supplement: Supplementary file 3 [file a5474966184e1c2b6f6a3356.docx]
