# Supplementary material for: R2R3-MYB Transcription Factor Family in Boehmeria nivea (L.) Gaudich: Potential Associations between Cd2+ Stress and Flavonoid Metabolism
Source: Research Square preprint supplement (doi:10.21203/rs.3.rs-871051/v1), 2021-09-21
Supplement: Supplementary file 4 [file e74f2e695f6cad12c3496370.xlsx]

## Sheet: a
Table S7: The RNA-seq data of BnGMYB genes in different tissues and developmental stages.
Gene list		phloem_first period	phloem_second period	phloem_third period	phloem_fourth period	phloem_fifth period	Hydroponic root	Terrestrial root	Leaf red variety HX_1	Leaf green variety ZZ_1
BnGMYB1	Maker00095444	9.42	6.09333	11.38	6.05333	10.7467	11.3	14.8667	9.21938	13.9782
BnGMYB2	Maker00075382	0.0533333	0.0266667	0.0666667	0.496667	7.58	4.35	3.82	0	0
BnGMYB3	Maker00075016	0.02	0	0	0	0	4.64	8.88667	1.63188	2.10104
BnGMYB4	Maker00076082	0.596667	0.236667	0.183333	0.02	0	7.78667	8.22333	17.6108	12.4495
BnGMYB5	Maker00076244	1.36	0.696667	1.09	0.806667	0.793333	12.8033	0.706667	1.42977	2.00825
BnGMYB6	Maker00075734	0.0833333	0	0.0766667	0.0333333	0	0	0	0	0.0979209
BnGMYB7	Maker00076183	0.3	0.203333	0.466667	0.393333	1.24	0.536667	0.963333	0.317478	0.327046
BnGMYB8	Maker00016119	0	0.0166667	0.0166667	0	0.0166667	0.06	0.0333333	1.075e-24	0.0288961
BnGMYB9	Maker00065771	2.50333	4.29333	7.18667	5.81667	5.93333	8.02	3.63	4.65127	9.89277
BnGMYB10	Maker00091496	25.39	8.51667	5.66333	1.52667	7.62667	81.7733	5.18667	38.1982	20.3081
BnGMYB11	Maker00091416	4.13333	2.41667	2.56	3.36333	5.49333	18.55	6.6	6.18348	5.4404
BnGMYB12	Maker00091361	2.18	0.42	0.69	0.79	1.16667	13.62	1.5	1.02678	0.163341
BnGMYB13	Maker00044418	2.62333	1.98	4.61667	12.1233	11.6633	13.2967	15.0033	0.0492092	0.0441505
BnGMYB14	Maker00025443	0.123333	0.246667	0.67	0.36	0.07	5.13667	19.7767	1.90555	1.43726
BnGMYB15	Maker00030668	0	0	0	0	0	0	0	0	0
BnGMYB16	Maker00030423	0.0533333	0.0433333	0.15	0.0666667	0.0266667	182.39	408.453	31.2221	17.4507
BnGMYB17	Maker00029953	0.826667	0.983333	0.926667	0.93	2.09333	1.11667	1.01333	10.4283	10.4097
BnGMYB18	Maker00050665	48.5433	110.44	104.72	93.5667	16.0267	10.72	21.4333	4.93599	8.25269
BnGMYB19	Maker00071853	0.336667	0.41	0.343333	0.183333	0	0	0.0733333	0	0.119449
BnGMYB20	Maker00062204	0	0	0	0	0.01	0.0666667	0.0933333	0	0.119449
BnGMYB21	Maker00055186	4.96333	3.39	6.94333	3.59	13.69	23.9067	6.34667	3.99842	6.65894
BnGMYB22	Maker00040122	1.12	0.866667	1.40333	1.14	4.05667	0.0466667	0	3.99842	6.65894
BnGMYB23	Maker00067925	0.0733333	0	0.11	0.0666667	0.11	0.563333	0.933333	11.1672	11.6204
BnGMYB24	Maker00039955	0.74	0.21	0.533333	0.97	0.253333	0.3	0.373333	11.1672	11.6204
BnGMYB25	Maker00012681	1.58333	7.46667	4.52333	11.3467	0.39	1.46333	2.40667	5.52746	5.07364
BnGMYB26	Maker00013653	0.17	1.45667	0.556667	0.18	0.123333	0.313333	0.12	0.954779	0.0990339
BnGMYB27	Maker00057272	2.74333	0.25	0.196667	0.236667	0.0833333	0.293333	2.82333	22.7402	13.9709
BnGMYB28	Maker00000585	24.6833	19.1567	34.39	28.2067	1.11	3.16667	5.73333	79.1247	46.8178
BnGMYB29	Maker00000713	0	0.04	0.03	0.0566667	0	0.0266667	0.146667	0.0450509	1.47e-07
BnGMYB30	Maker00000810	0	0	0	0	0.0166667	0	0	0.158706	0
BnGMYB31	Maker00000820	0.14	0.0166667	0.0633333	0.09	0.636667	17.0667	0.24	0.0622626	0.511449
BnGMYB32	Maker00077519	0	0.0166667	0	0	0	0	0	0	0
BnGMYB33	Maker00077618	5.84667	13.5067	5.84333	60.67	32.0867	17.8867	53.9333	0	0.0999408
BnGMYB34	Maker00077797	6.96	13.4967	8.01	10.72	5.18	3.05667	3.55333	1.60291	2.07983
BnGMYB35	Maker00077684	0.0133333	0	1.22333	6.85667	4.48	0	0.516667	1.04612	1.59935
BnGMYB36	Maker00052728	0.0566667	0.0433333	0.156667	0.153333	0.546667	0.876667	0.586667	0	0
BnGMYB37	Maker00017016	48.32	34.2967	47.7633	38.22	56.14	33.1233	50.3767	29.8296	13.5626
BnGMYB38	Maker00066632	6.56667	6.26333	6.55333	6.13333	11.1733	7.51	8.08333	10.4283	10.4097
BnGMYB39	Maker00066517	0.0266667	0.123333	0	0.0266667	0.19	0.74	0.113333	0	0.0349946
BnGMYB40	Maker00006515	0.146667	0.0866667	0.946667	0.66	3.53667	5.25667	7.31667	3.55005	6.9619
BnGMYB41	Maker00090582	50.6133	59.5033	106.393	43.5233	65.4067	54.7267	73.7633	119.628	98.7145
BnGMYB42	Maker00083753	2.99333	2.75333	2.86333	1.68333	0.743333	1.71667	4.41	4.17796	4.32277
BnGMYB43	Maker00061978	0	0	0.0733333	0	0	0.0733333	0	0.139815	0.329554
BnGMYB44	Maker00080208	0.106667	0	0	0	0.146667	0.08	0.203333	0.139815	0.329554
BnGMYB45	Maker00079675	4.43	4.76	1.30333	2.32333	0.533333	3.28333	4.23	7.31396	3.51966
BnGMYB46	Maker00042590	0	0	0	0	0	0.45	0	0	0
BnGMYB47	Maker00042256	3.74	2.37	4.18667	2.58333	10.24	7.70333	1.12333	7.16462	8.79597
BnGMYB48	Maker00002294	0.446667	0.39	0.99	0.98	9.28667	7.35667	1.76667	2.84887	5.23634
BnGMYB49	Maker00091900	1.12667	0.08	0.663333	0.19	0.33	1.83667	5.75333	1.2703	1.19038
BnGMYB50	Maker00056555	0.153333	0	0.116667	0.0166667	0.0533333	0.116667	0	1.2703	1.19038
BnGMYB51	Maker00089493	0	0.0166667	0.0733333	0.0333333	0.05	0	0	1.075e-24	0.0288961
BnGMYB52	Gene.34335	0	0	0.0433333	0	0	0	0	0.166772	0.0599096
BnGMYB53	Maker00034258	0	0	0.0166667	0	0	0	0	1.075e-24	0.0288961
BnGMYB54	Maker00064417	7.34667	1.23667	1.73	0	0	1.28	0	0.649554	1.66257
BnGMYB55	Maker00063941	0.813333	0.703333	3.21	0.55	0.426667	0.03	2.47333	0.142319	0.141663
BnGMYB56	Maker00064534	38.57	21.48	26.5967	23.92	44.73	55.5267	72.0333	11.0414	12.158
BnGMYB57	Maker00064788	0.226667	0.106667	1.06667	0.35	6.25667	0.8	1.65	303.804	186.852
BnGMYB58	Maker00064504	0	0.02	0	0	0	0.4	0	0	0
BnGMYB59	Maker00079198	0	0	0	0	0	0	0	0.166772	0.0599096
BnGMYB60	Maker00087487	1.66667	2.07333	2.57667	2.28333	10.0433	55.8933	5.58667	5.55951	19.7934
BnGMYB61	Maker00087187	0.44	0.163333	0.116667	0.0533333	0.12	5.67667	0.31	3.8527	3.64481
BnGMYB62	Maker00087523	1.10333	0.603333	0.533333	0.09	0.286667	8.20667	0.276667	4.78368	4.76839
BnGMYB63	Maker00086957	3.85333	1.52333	2.65	0.363333	2.18	4.99	0.35	3.77688e-18	0.109413
BnGMYB64	Maker00010012	3.11667	3.19	1.86667	0.716667	1.84	11.12	2.01667	5.97815	8.6693
BnGMYB65	Maker00010005	0	0.0166667	0	0.0533333	0	0.41	0.0766667	0	0
BnGMYB66	Maker00041853	0	0	0.18	0.32	5.74333	0.506667	1.88667	0	0
BnGMYB67	Maker09720	0.02	0	0.21	0.326667	6.38	0.283333	0.813333	0	0
BnGMYB68	Maker00073830	0.103333	0	0	0	0	0.253333	0.136667	0.984798	0.51782
BnGMYB69	Maker00074230	0	0.4	0.726667	0.643333	1.86333	1.42333	2.52667	0.0202331	0.227744
BnGMYB70	Maker00074173	1.62	1.60667	2.29333	1.49333	6.97	16.2567	2.17	0.0898097	1.47502
BnGMYB71	Maker00063010	0.803333	1.83667	3.35	6.48333	2.64333	7.58	23.4367	0.0780127	0.276616
BnGMYB72	Maker00059272	0.02	0	0	0	0.0633333	0.0433333	0	0.0310606	0.0811349
BnGMYB73	Maker00059234	0.0633333	0	0	0	0	26.0467	28.28	1.37931	1.7532
BnGMYB74	Maker00049342	3.79667	1.03667	1.38333	1.86	9.56667	0	0	12.9802	9.70823
BnGMYB75	Maker00049331	0	0	0	0	0	0	0	0	0
BnGMYB76	Maker00049451	26.6033	28.7167	28.8967	8.1	4.24667	5.8	26.25	7.64836	14.4257
BnGMYB77	Maker00000907	7.47	8.56667	58.8233	45.42	56.2767	38.81	28.08	1.37931	1.7532
BnGMYB78	Maker00019930	4.24667	17.1033	43.24	30.67	1.04	0.89	2.80667	25.835	31.0677
BnGMYB79	Maker00033008	1.05667	0.856667	0.383333	0.0466667	0.0266667	0.113333	0.156667	0.509135	5.83548
BnGMYB80	Maker00059685	0.216667	0.33	0.0166667	0	0	0	0	0.509135	5.83548
BnGMYB81	Maker00060251	0.133333	0.0833333	0.22	0.0933333	0	0	0.403333	1.43253	0.368079
BnGMYB82	Maker00069320	1.61	1.91333	1.17333	1.73667	2.09667	3.19667	3.53	0.126049	0.582808
BnGMYB83	Maker00037560	0.0133333	0	0	0	0	1.63	1.07333	0	0
BnGMYB84	Maker00041645	0.0133333	0	0.713333	0.476667	7.64333	4.22333	2.12	0	0
BnGMYB85	Maker00052046	7.14333	6.82667	7.79	7.24333	6.17	2.06667	3.12333	0.126049	0.582808
BnGMYB86	Maker00077137	0.226667	0.0833333	0.0666667	0.03	0.126667	0.0366667	0.17	0.248687	0.100736
BnGMYB87	Maker00008700	0.946667	1.31333	0.31	0.27	0.16	0.213333	0.136667	0.265357	0.541639
BnGMYB88	Maker00058379	0.0266667	0.0133333	0.11	0.493333	14.8667	7.17333	2.89667	0	0
BnGMYB89	Maker00058364	54.8167	47.87	74.2933	65.79	66.3233	48.86	51.5133	36.9621	65.2047
BnGMYB90	Maker00003213	161.803	93.9733	235.27	181.603	160.957	77.9767	230.427	631.066	395.371
BnGMYB91	Maker00047127	158.893	91.7133	253.35	206.143	128.057	40.05	115.15	631.066	395.371
BnGMYB92	Maker00043616	1.29333	0.456667	1.7	1.54333	9.65333	10.6367	2.70667	0.0272633	0
BnGMYB93	Maker00043572	3.96667	2.8	3.99333	3.73	20.77	53.9767	9.75667	24.9171	56.7768
BnGMYB94	Maker00043647	0.0166667	0.05	0.566667	0.223333	2.95333	5.97333	3.95	14.8859	12.3006
BnGMYB95	Maker00043660	3.27667	2.78333	1.38	0.706667	1.09	4.69333	2.06	0.838291	0.698198
BnGMYB96	Maker00024528	42.9	23.56	32.3667	16.27	43.0267	16.37	46.8633	18.3936	29.462
BnGMYB97	Maker00083096	38.1433	23.7733	30.0833	9.15	9.82	12.85	21.7467	15.9084	23.5611
BnGMYB98	Maker00096205	0.06	0.0433333	0.603333	0.38	13.3367	0.346667	4.13	0	0.0495554
BnGMYB99	Maker00055315	0.123333	0.136667	0.22	0.08	0.293333	2.25667	0.07	0	0.0349946
BnGMYB100	Maker00019397	1.91667	2.08	4.21333	3.02667	0.256667	0.366667	3.69	55.2037	43.2716
BnGMYB101	Maker00032889	0	0	0	0	0	0	0	0	0
BnGMYB102	Maker00032881	4.67	3.6	17.3433	8.44333	21.1967	39.0233	12.0467	0.422431	0.42524
BnGMYB103	Maker00022368	3.24	2.88	6.43	5.06333	0.42	0.54	5.01333	55.2037	43.2716
BnGMYB104	Maker00031449	7.88	1.66333	6.26667	5.15333	4.58	57.7933	134.547	31.2221	17.4507
BnGMYB105	Maker00006748	0	0	0	0	0	0.43	3.42667	0	0.0495554

## Sheet: b
Table. S7 Differential expression of RNA-seq of anthocyanin, proanthocyanin and flavonoids related genes in ZZ_1 VS HX_1
clade	gene ID	rename ID	baseMean_control_ZZ1	baseMean_case_HX1	FC	log2FC
C1	Maker00087523	BnGMYB62	54.8367	52.1845	0.951634	-0.0715216
	Maker00086957	BnGMYB63	1.03977	0	0	0
	Maker00087187	BnGMYB61	41.6203	43.8591	1.05379	0.0755866
	Maker00043572	BnGMYB93	489.031	213.047	0.435651	-1.19875
	Maker00043647	BnGMYB94	110.077	139.416	1.26653	0.340879
	Maker00043660	BnGMYB95	4.80069	5.88414	1.22569	0.293591
	Maker00042590	BnGMYB46	0	0	0	0
	Maker00091496	BnGMYB10	508.582	637.281	1.25305	0.325448
	Maker00091416	BnGMYB11	44.0484	48.1628	1.09341	0.128831
	Maker00091361	BnGMYB12	1.71317	10.6671	6.22654	2.63843
C2	Maker00052046	BnGMYB85	4.86175	1.0491	0.215785	-2.21233
	Maker00069320	BnGMYB82	0	0	0	0
	Maker00064788	BnGMYB57	4104.65	6619.39	1.61266	0.689439
	Maker00049342	BnGMYB74	75.3509	101.326	1.34472	0.427302
C3	Maker00042256	BnGMYB47	115.325	92.7319	0.804088	-0.314574
C4	Maker00087487	BnGMYB60	179.437	50.1091	0.279257	-1.84033
C5	Maker00074173	BnGMYB70	4.4658	12.5932	2.81992	1.49565
	Maker00002294	BnGMYB48	43.2206	23.2146	0.537118	-0.896689
	Maker00055186	BnGMYB21	57.6704	34.2572	0.594017	-0.751425
	Maker00040122	BnGMYB22	57.6704	34.2572	0.594017	-0.751425
C7	Maker00064504	BnGMYB58	0	0	0	0
	Maker00000820	BnGMYB31	5.38632	0.531665	0.0987065	-3.34071

## Sheet: c
Table. S7 The RNA-seq data of BnGMYB genes in different tissues and developmental stages.
Lack expreession information	FPKM>0 in all 8 tissues	Constitutive expression	Preferential expression in
			phloem_third period	Terrestrial root	Leaf green variety ZZ_1
BnGMYB15	BnGMYB1	BnGMYB1	BnGMYB18	BnGMYB2	BnGMYB4
BnGMYB75	BnGMYB5	BnGMYB9	BnGMYB34	BnGMYB3	BnGMYB10
BnGMYB101	BnGMYB7	BnGMYB11	BnGMYB55	BnGMYB11	BnGMYB23
	BnGMYB9	BnGMYB18	BnGMYB63	BnGMYB13	BnGMYB25
	BnGMYB10	BnGMYB21	BnGMYB70	BnGMYB14	BnGMYB27
	BnGMYB11	BnGMYB37	BnGMYB76	BnGMYB16	BnGMYB28
	BnGMYB12	BnGMYB38	BnGMYB77	BnGMYB33	BnGMYB45
	BnGMYB13	BnGMYB41	BnGMYB78	BnGMYB40	BnGMYB47
	BnGMYB14	BnGMYB56	BnGMYB85	BnGMYB49	BnGMYB48
	BnGMYB16	BnGMYB76	BnGMYB89	BnGMYB56	BnGMYB57
	BnGMYB17	BnGMYB89	BnGMYB102	BnGMYB60	BnGMYB61
	BnGMYB18	BnGMYB90		BnGMYB69	BnGMYB62
	BnGMYB21	BnGMYB91		BnGMYB71	BnGMYB74
	BnGMYB24	BnGMYB93		BnGMYB73	BnGMYB90
	BnGMYB25	BnGMYB96		BnGMYB82	BnGMYB91
	BnGMYB26	BnGMYB97		BnGMYB84	BnGMYB93
	BnGMYB27			BnGMYB88	BnGMYB94
	BnGMYB28			BnGMYB95	BnGMYB100
	BnGMYB31			BnGMYB96	BnGMYB103
	BnGMYB34			BnGMYB98
	BnGMYB37			BnGMYB104
	BnGMYB38			BnGMYB105
	BnGMYB40
	BnGMYB41
	BnGMYB42
	BnGMYB45
	BnGMYB47
	BnGMYB48
	BnGMYB49
	BnGMYB55
	BnGMYB56
	BnGMYB57
	BnGMYB60
	BnGMYB61
	BnGMYB62
	BnGMYB70
	BnGMYB71
	BnGMYB76
	BnGMYB77
	BnGMYB78
	BnGMYB79
	BnGMYB82
	BnGMYB85
	BnGMYB86
	BnGMYB87
	BnGMYB89
	BnGMYB90
	BnGMYB91
	BnGMYB93
	BnGMYB94
	BnGMYB95
	BnGMYB96
	BnGMYB97
	BnGMYB100
	BnGMYB102
	BnGMYB103
	BnGMYB104
