# Supplementary material for: R2R3-MYB Transcription Factor Family in Boehmeria nivea (L.) Gaudich: Potential Associations between Cd2+ Stress and Flavonoid Metabolism
Source: Research Square preprint supplement (doi:10.21203/rs.3.rs-871051/v1), 2021-09-21
Supplement: Supplementary file [file 0d2908a4d5f268f5df0e2c4b.pdf]

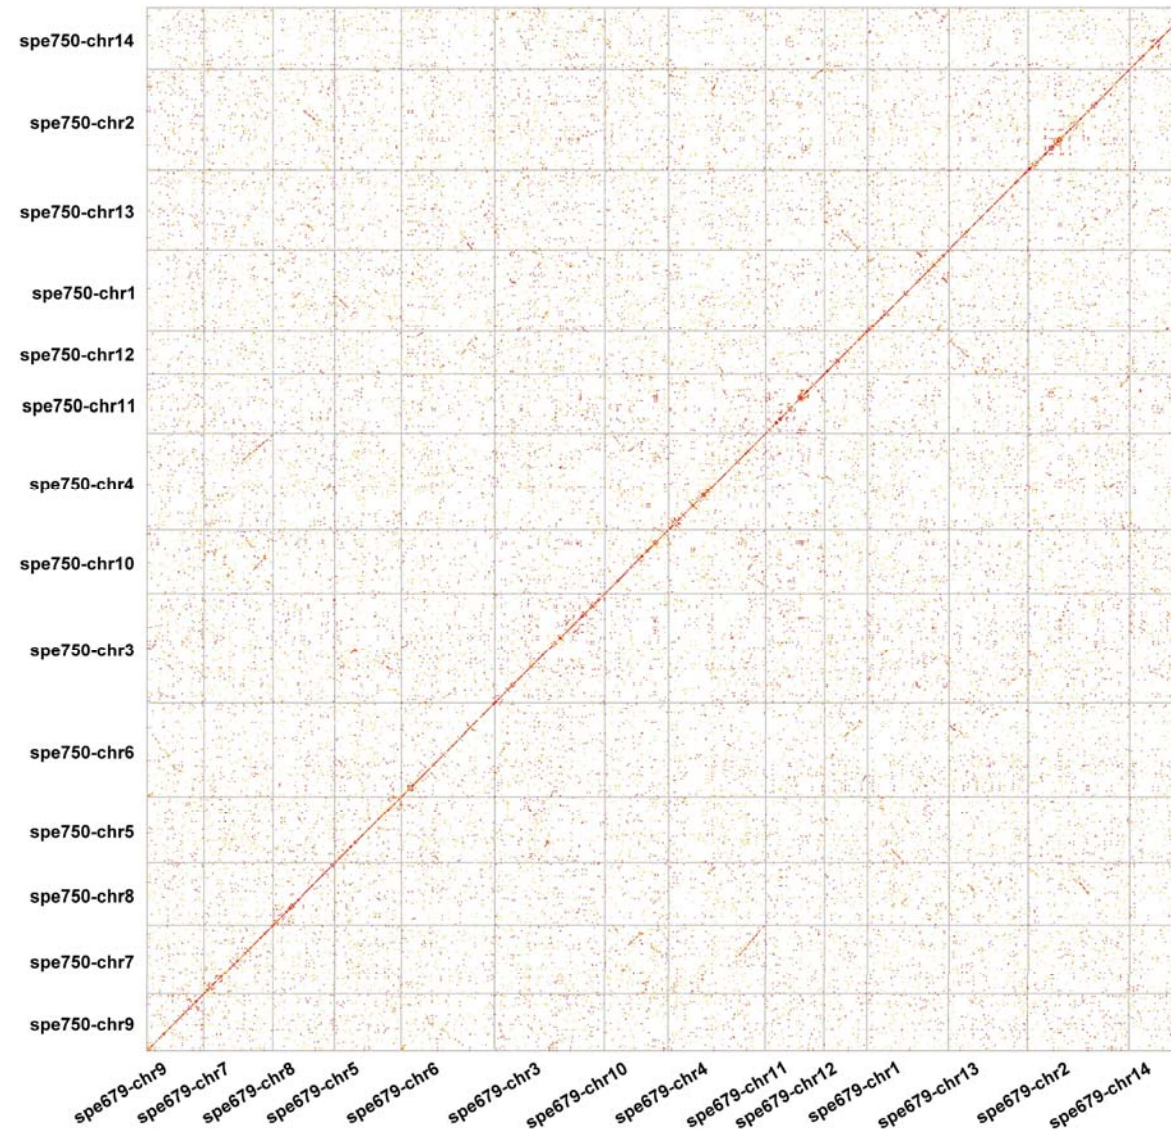

Figure S3: Comparative genomic analysis—WDGI.

The point with the best homology is red (The highest similarity). The diagonals are not self-alignments of genes, but tandem repeats.
